# Supplementary material for: Conformation impact on spectral properties of bis(5,7-dimethyl-1,8-naphthyridin-2-yl)amine and its ZnII complex
Source: Royal Society of Chemistry journal article supplement (doi:10.1039/b705149b), 2007-01-01
Supplement: b705149b.pdf [file b705149b.pdf]

## Electronic Supplementary Information

### Conformation impact on spectral properties of bis(5,7-dimethyl-1,8-naphthyridin-2-yl)amine and its Zn<sup>II</sup> complex

Yong Chen, Wen-Fu Fu,\* Jun-Li Li, Xi-Juan Zhao, Xue-Mei Ou

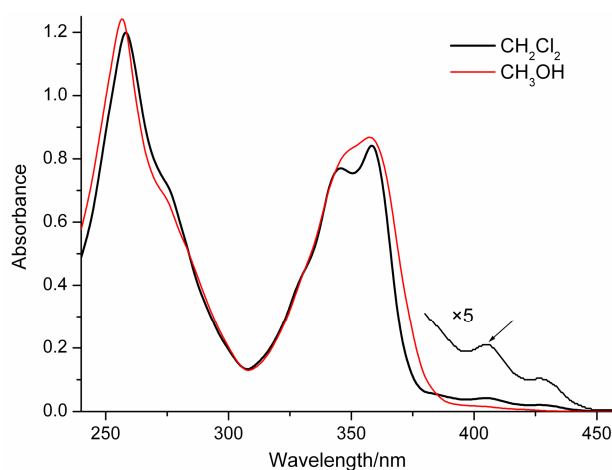

Figure S1 Absorption spectra of compound **2** in dichloromethane (black line) and methanol (red line) at room temperature.

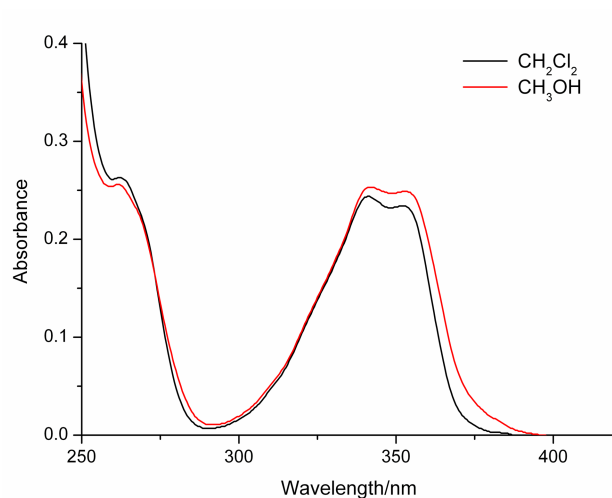

Figure S2 Absorption spectra of compound **3** in dichloromethane (black line) and methanol (red line) at room temperature.

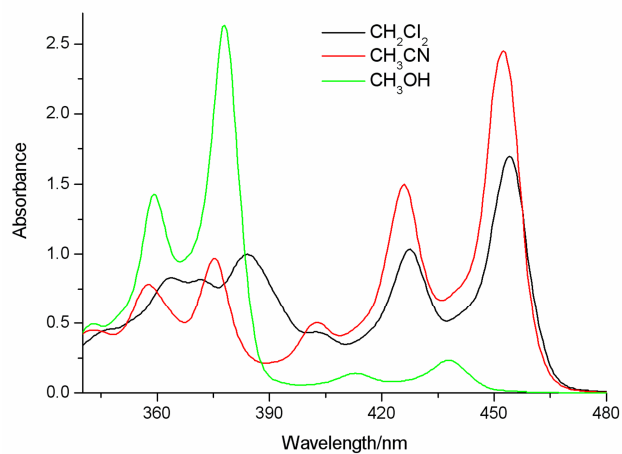

Figure S3 Absorption spectra of complex **4** in dichloromethane (black line), acetonitrile (red line), and methanol (green line) at room temperature.

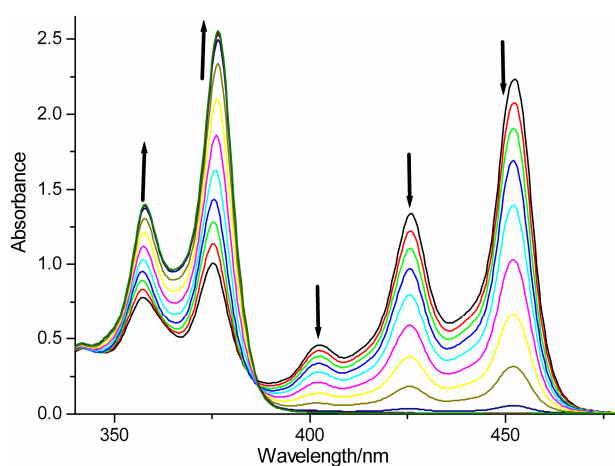

Figure S4 Absorption spectra changes of complex **4** in acetonitrile at room temperature upon addition of HBF<sub>4</sub>. Arrows indicate changes in the intensities of bands upon acidification.

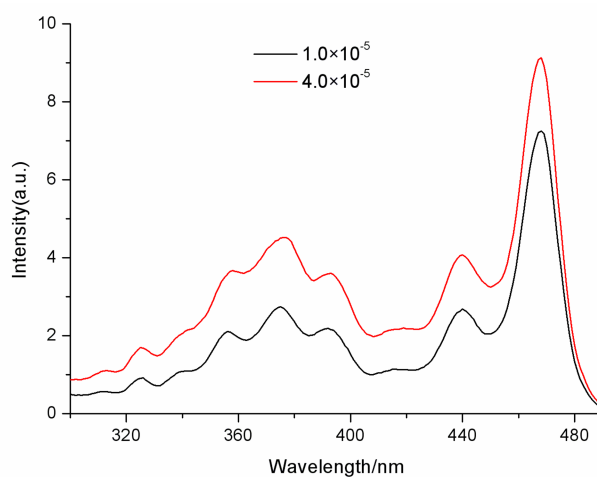

Figure S5 The excitation spectra corresponding to emission at 506 nm with various concentration of **1** (black line,  $1.0 \times 10^{-5} \text{ mol L}^{-1}$ ; red line,  $4.0 \times 10^{-5} \text{ mol L}^{-1}$ ).

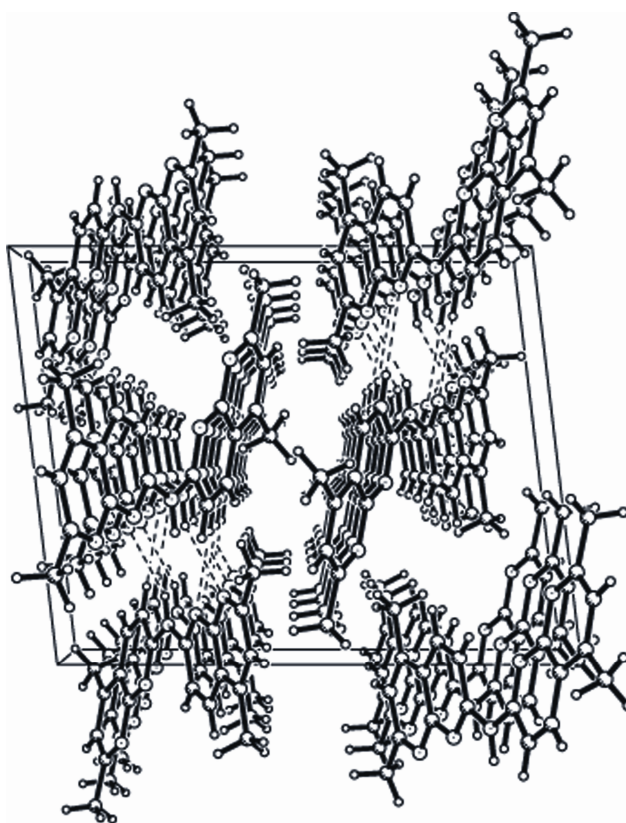

Figure S6 The crystal packing diagram of **1** with 50% probability ellipsoids, showing the intermolecular N-H...N and C-H...N hydrogen bonds linking screw-axis related molecules to generate a chain of molecules extending along the b-direction.

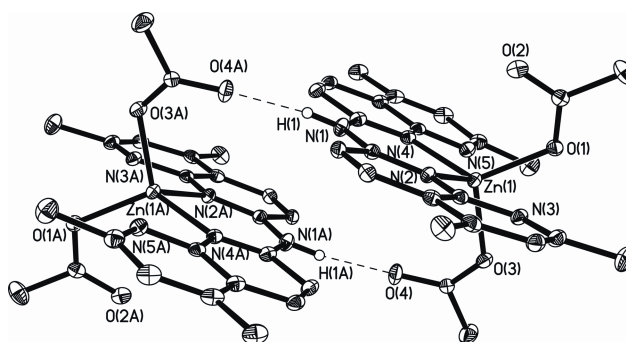

Figure S7 The centrosymmetric H-bonded dimer of **4** with 30% probability ellipsoids is generated by two intermolecular hydrogen bonds of N(1)-H(1)···O(4A) and N(1A)-H(1A)···O(4). The H-atoms not relevant to hydrogen bonds are omitted for clarity.

---
